# Supplementary material
Source: PubMed Central journal article supplement (PMC6137544)

Supplemental Figure 1

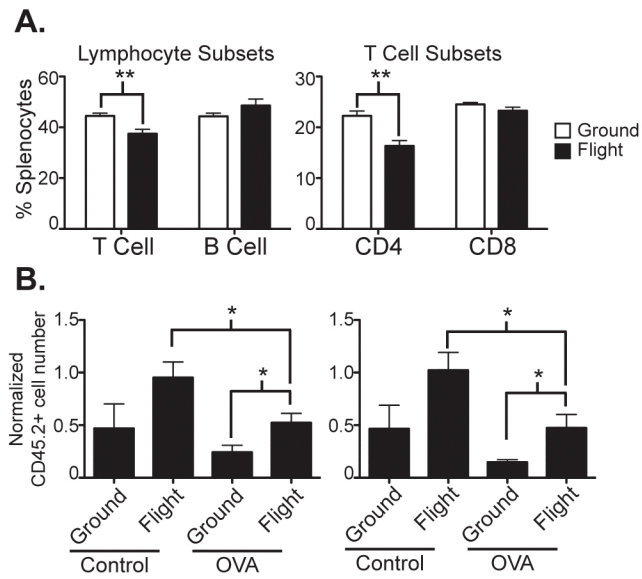

Supplemental Figure 3

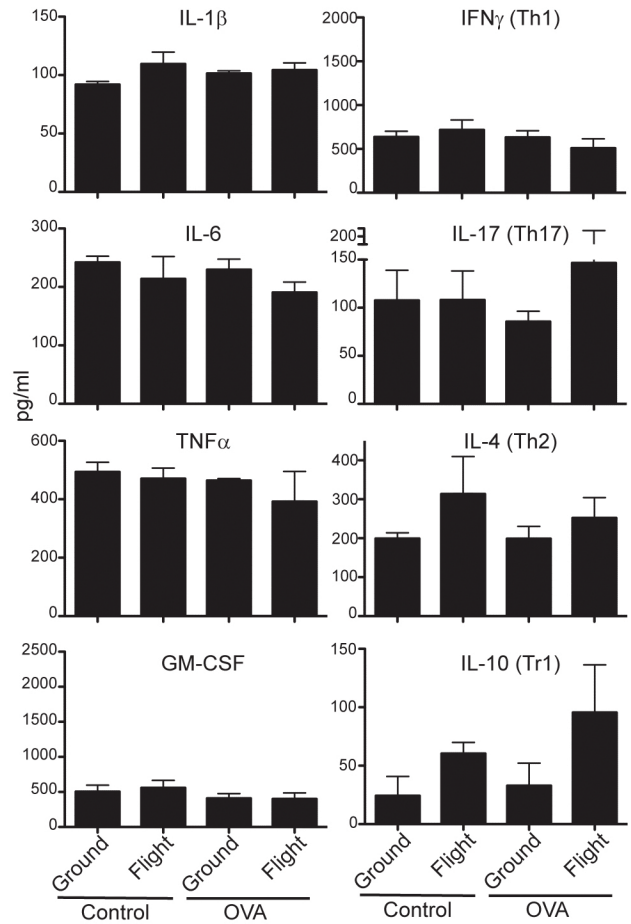

Supplemental Figure 2

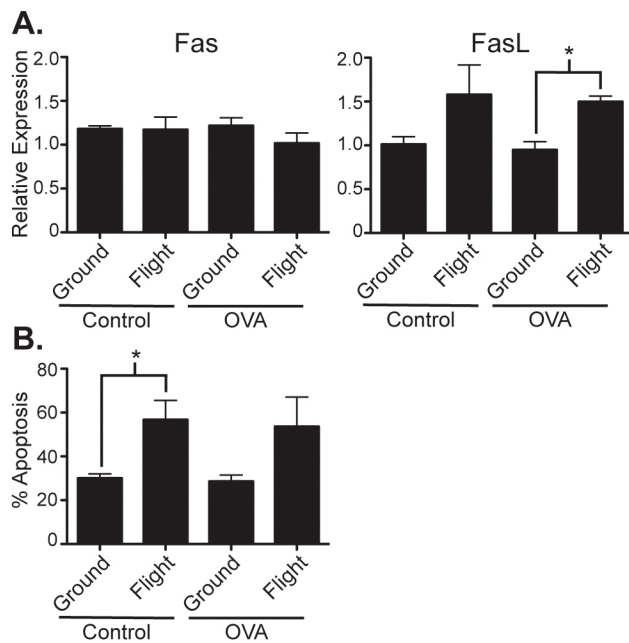

Supplement: fj.15-275073.sf1.pdf [file fj.15-275073.sf1.pdf]
